# Supplementary material
Source: PubMed Central journal article supplement (PMC4966516)
Supplement: supp_JCO.2015.65.8716_DS_2015.658716.pdf [file supp_JCO.2015.65.8716_DS_2015.658716.pdf]

# **Disparities in Use of HER2-targeted Therapy for Early Stage Breast Cancer**

**Reeder-Hayes, et al**

**APPENDIX A: CODES FOR TREATMENTS**

For defined regimens, ACTH was defined as a pattern of claims including a first claim for doxorubicin occurring before or on the same date as a first claim for trastuzumab, with the first claim for trastuzumab appearing within 120 days after the first doxorubicin claim, at least 2 doxorubicin claims within 60 days and at least one claim for either docetaxel or paclitaxel within +/- 7 days of the first trastuzumab claim. TCH was defined as a first carboplatin claim and a first docetaxel claim appearing within +/- 7 days of the first trastuzumab claim and at least 2 carboplatin claims within 60 days.

**1. Table of codes used to identify the drug categories:**

| <b>Drug Category</b>           | <b>HCPCS/CPT codes searched</b>                                                                                                                                                                                                                                                                                                                                                                                                                                                                                                                                                                                                                                                                                                                                                                                                                                                                                                                                                                                                                                            |
|--------------------------------|----------------------------------------------------------------------------------------------------------------------------------------------------------------------------------------------------------------------------------------------------------------------------------------------------------------------------------------------------------------------------------------------------------------------------------------------------------------------------------------------------------------------------------------------------------------------------------------------------------------------------------------------------------------------------------------------------------------------------------------------------------------------------------------------------------------------------------------------------------------------------------------------------------------------------------------------------------------------------------------------------------------------------------------------------------------------------|
| Trastuzumab                    | J9355                                                                                                                                                                                                                                                                                                                                                                                                                                                                                                                                                                                                                                                                                                                                                                                                                                                                                                                                                                                                                                                                      |
| Doxorubicin                    | C9415, J9000                                                                                                                                                                                                                                                                                                                                                                                                                                                                                                                                                                                                                                                                                                                                                                                                                                                                                                                                                                                                                                                               |
| Taxanes (docetaxel/paclitaxel) | C9127, C9431, J9170, J9171, J9264, J9265                                                                                                                                                                                                                                                                                                                                                                                                                                                                                                                                                                                                                                                                                                                                                                                                                                                                                                                                                                                                                                   |
| Carboplatin                    | J9045                                                                                                                                                                                                                                                                                                                                                                                                                                                                                                                                                                                                                                                                                                                                                                                                                                                                                                                                                                                                                                                                      |
| Other chemotherapy drugs       | C9004, C9012, C9020, C9110, C9120, C9129, C9131, C9205, C9207, C9214, C9218, C9233, C9235, C9239, C9240, C9253, C9257, C9259, C9260, C9262, C9265, C9273, C9276, C9280, C9284, C9287, C9292, C9295, C9296, C9298, C9414, C9417, C9418, C9420, C9421, C9422, C9423, C9424, C9425, C9426, C9427, C9428, C9429, C9432, C9433, C9436, C9437, C9440, J8510, J8520, J8521, J8530, J8560, J8561, J8562, J8565, J8600, J8610, J8700, J8705, J8999, J9001, J9002, J9010, J9015, J9017, J9020, J9025, J9027, J9033, J9035, J9040, J9041, J9042, J9043, J9050, J9055, J9060, J9062, J9065, J9070, J9080, J9090, J9091, J9092, J9093, J9094, J9095, J9096, J9097, J9098, J9100, J9110, J9130, J9140, J9150, J9151, J9155, J9178, J9179, J9180, J9181, J9182, J9185, J9190, J9200, J9201, J9206, J9207, J9208, J9211, J9212, J9213, J9214, J9215, J9216, J9228, J9230, J9245, J9250, J9260, J9261, J9263, J9266, J9268, J9270, J9280, J9290, J9291, J9293, J9300, J9302, J9303, J9305, J9310, J9315, J9320, J9328, J9330, J9340, J9350, J9351, J9357, J9360, J9370, J9375, J9380, J9390 |

**2: Table of codes used to identify breast surgeries**

| <b>Procedure</b>          | <b>ICD-9-CM</b>  | <b>HCPCS/CPT</b>                                                     |
|---------------------------|------------------|----------------------------------------------------------------------|
| Mastectomy                | PROCEDURE: 85.4x | 19180, 19182, 19200, 19220, 19240, 19303, 19304, 19305, 19306, 19307 |
| Breast Conserving Surgery | PROCEDURE: 85.2x | 19101, 19110, 19120, 19125, 19126, 19160, 19162, 19300, 19301, 19302 |

**3: Table of codes used to identify radiation therapy**

| <b>ICD-9-CM</b>                                    | <b>REVENUE CENTER</b> | <b>HCPCS/CPT</b>                                                 |
|----------------------------------------------------|-----------------------|------------------------------------------------------------------|
| DIAGNOSIS: V58.0, V66.1, V67.1<br>PROCEDURE: 92.2x | 0330, 0333, 0339      | 772xx, 773xx, 774xx, 775xx, 7775x, 7776x,<br>7777x, 7778x, 7779x |

### Chemotherapy Drug HCPCS Codes

| CODE  | DESCRIPTION                                |
|-------|--------------------------------------------|
| J9355 | Trastuzumab [ <b>Herceptin</b> ] injection |
| J9045 | <b>Carboplatin</b> injection               |
| C9415 | <b>Doxorubic</b> HCl chemo, brand          |
| J9000 | <b>Doxorubicin</b> HCl injection           |
| J9170 | <b>Docetaxel</b> injection                 |
| J9171 | <b>Docetaxel</b> injection                 |
| C9127 | <b>Paclitaxel</b> protein pr               |
| C9431 | <b>Paclitaxel</b> inj, brand               |
| J9264 | <b>Paclitaxel</b> protein bound            |
| J9265 | <b>Paclitaxel</b> injection                |
| C9420 | <b>Cyclophosphamide</b> inj, brand         |
| C9421 | <b>Cyclophosphamide</b> lyo, brand         |
| J8530 | <b>Cyclophosphamide</b> oral 25 mg         |
| J9070 | <b>Cyclophosphamide</b> 100 mg inj         |
| J9080 | <b>Cyclophosphamide</b> 200 mg inj         |
| J9090 | <b>Cyclophosphamide</b> 500 mg inj         |
| J9091 | <b>Cyclophosphamide</b> 1.0 grm inj        |
| J9092 | <b>Cyclophosphamide</b> 2.0 grm inj        |
| J9093 | <b>Cyclophosphamide</b> lyophilized        |
| J9094 | <b>Cyclophosphamide</b> lyophilized        |
| J9095 | <b>Cyclophosphamide</b> lyophilized        |
| J9096 | <b>Cyclophosphamide</b> lyophilized        |
| J9097 | <b>Cyclophosphamide</b> lyophilized        |
| J9190 | Fluorouracil injection                     |
| J8610 | Methotrexate oral 2.5 mg                   |
| J9250 | Methotrexate sodium inj                    |
| J9260 | Methotrexate sodium inj                    |
| C9004 | Gemtuzumab ozogamicin inj,5m               |
| C9012 | Injection, arsenic trioxide                |
| C9020 | Sirolimus tablet, 1 mg                     |
| C9110 | Alemtuzumab, per 10mg/ml                   |
| C9120 | Injection, fulvestrant                     |
| C9129 | Inj clofarabine                            |
| C9205 | Oxaliplatin                                |
| C9207 | Injection, bortezomib                      |
| C9214 | Injection, bevacizumab                     |
| C9218 | Injection, azacitidine                     |
| C9233 | Injection, ranibizumab                     |

| CODE  | DESCRIPTION                  |
|-------|------------------------------|
| C9235 | Injection, panitumumab       |
| C9239 | Inj, temsirolimus            |
| C9240 | Injection ixabepilone        |
| C9253 | Injection, temozolomide      |
| C9257 | Bevacizumab injection        |
| C9260 | Ofatumumab injection         |
| C9262 | Fludarabine phosphate, oral  |
| C9265 | Romidepsin injection         |
| C9273 | Sipuleucel-T, per infusion   |
| C9276 | Cabazitaxel injection        |
| C9280 | Injection, eribulin mesylate |
| C9284 | Injection, ipilimumab        |
| C9287 | Inj, brentuximab vedotin     |
| C9292 | Injection, pertuzumab        |
| C9414 | Etoposide oral, brand        |
| C9417 | Bleomycin sulfate inj, brand |
| C9418 | Cisplatin inj, brand         |
| C9422 | Cytarabine HCl inj, brand    |
| C9423 | Dacarbazine inj, brand       |
| C9424 | Daunorubicin, brand          |
| C9425 | Etoposide inj, brand         |
| C9426 | Floxuridine inj, brand       |
| C9427 | Ifosfamide inj, brand        |
| C9428 | Mesna injection, brand       |
| C9429 | Idarubicin HCl inj, brand    |
| C9432 | Mitomycin inj, brand         |
| C9433 | Thiotepa inj, brand          |
| C9436 | Azathioprine, parenteral, br |
| C9437 | Carmustine, brand name, per  |
| C9440 | Vinorelbine tar, brand       |
| J8510 | Oral busulfan                |
| J8520 | Capecitabine, oral, 150 mg   |
| J8521 | Capecitabine, oral, 500 mg   |
| J8560 | Etoposide oral 50 mg         |
| J8561 | Oral everolimus              |
| J8562 | Oral fludarabine phosphate   |
| J8565 | Gefitinib oral               |
| J8600 | Melphalan oral 2 mg          |

| CODE  | DESCRIPTION                  |
|-------|------------------------------|
| J8700 | Temozolomide                 |
| J8705 | Topotecan oral               |
| J8999 | Oral prescription drug chemo |
| J9001 | Doxorubicin HCl liposome inj |
| J9010 | Alemtuzumab injection        |
| J9015 | Aldesleukin injection        |
| J9017 | Arsenic trioxide injection   |
| J9020 | Asparaginase injection       |
| J9025 | Azacitidine injection        |
| J9027 | Clofarabine injection        |
| J9033 | Bendamustine injection       |
| J9035 | Bevacizumab injection        |
| J9040 | Bleomycin sulfate injection  |
| J9041 | Bortezomib injection         |
| J9043 | Cabazitaxel injection        |
| J9050 | Carmustine injection         |
| J9055 | Cetuximab injection          |
| J9060 | Cisplatin 10 mg injection    |
| J9062 | Cisplatin 50 mg injection    |
| J9065 | Inj cladribine per 1 mg      |
| J9098 | Cytarabine liposome inj      |
| J9100 | Cytarabine HCl 100 mg inj    |
| J9110 | Cytarabine HCl 500 mg inj    |
| J9130 | Dacarbazine 100 mg inj       |
| J9140 | Dacarbazine 200 mg inj       |
| J9150 | Daunorubicin injection       |
| J9151 | Daunorubicin citrate inj     |
| J9155 | Degarelix injection          |
| J9178 | Inj, epirubicin HCl, 2 mg    |
| J9179 | Eribulin mesylate injection  |
| J9180 | Epirubicin HCl injection     |
| J9181 | Etoposide injection          |
| J9182 | Etoposide 100 mg inj         |
| J9185 | Fludarabine phosphate inj    |
| J9200 | Floxuridine injection        |
| J9201 | Gemcitabine HCl injection    |
| J9206 | Irinotecan injection         |
| J9207 | Ixabepilone injection        |
| J9208 | Ifosfamide injection         |

| CODE  | DESCRIPTION                         |
|-------|-------------------------------------|
| J9211 | Idarubicin HCl injection            |
| J9212 | Interferon alfacon-1inj             |
| J9213 | Interferon alfa-2a inj              |
| J9214 | Interferon alfa-2b inj              |
| J9215 | Interferon alfa-n3 inj              |
| J9216 | Interferon gamma 1-b inj            |
| J9228 | Ipilimumab injection                |
| J9230 | Mechlorethamine HCl inj             |
| J9245 | Inj melphalan hydrochl 50 mg        |
| J9261 | Nelarabine injection                |
| J9263 | Oxaliplatin                         |
| J9266 | Pegaspargase injection              |
| J9268 | Pentostatin injection               |
| J9270 | Plicamycin (mithramycin) inj        |
| J9280 | Mitomycin 5 mg inj                  |
| J9290 | Mitomycin 20 mg inj                 |
| J9291 | Mitomycin 40 mg inj                 |
| J9293 | Mitoxantrone hydrochl / 5 mg        |
| J9300 | Gemtuzumab ozogamicin inj           |
| J9302 | Ofatumumab injection                |
| J9303 | Panitumumab injection               |
| J9305 | Pemetrexed injection                |
| J9310 | Rituximab injection                 |
| J9315 | Romidepsin injection                |
| J9320 | Streptozocin injection              |
| J9328 | Temozolomide injection              |
| J9330 | Temsirolimus injection              |
| J9340 | Thiotepa injection                  |
| J9350 | Topotecan injection                 |
| J9351 | Topotecan injection                 |
| J9357 | Valrubicin injection                |
| J9360 | Vinblastine sulfate inj             |
| J9370 | Vincristine sulfate 1 mg inj        |
| J9375 | Vincristine sulfate 2 mg inj        |
| J9380 | Vincristine sulfate 5 mg inj        |
| J9390 | Vinorelbine tartrate inj            |
| C9131 | Injection, ado-trastuzumab emtansin |
| C9259 | Injection, pralatrexate, 1 mg       |

| <b>CODE</b> | <b>DESCRIPTION</b>                                                  |
|-------------|---------------------------------------------------------------------|
| C9295       | Injection, carfilzomib, 1 mg                                        |
| C9296       | Injection, ziv-aflibercept, 1 mg                                    |
| C9298       | Injection, ocriplasmin, 0.125 mg                                    |
| J9002       | Injection, doxorubicin<br>hydrochloride, liposomal, doxil, 10<br>mg |
| J9042       | Injection, brentuximab vedotin, 1<br>mg                             |

## Appendix B. Modified Poisson Parameter Estimates for models using alternative measures of cardiac co-morbidity

|                                     |            | Conditions 12 months prior to 3 months post diagnosis<br>(excluding those with 1st Herceptin up to 90 days after diagnosis) |                             |                                 |                                                     |                          |                                          |
|-------------------------------------|------------|-----------------------------------------------------------------------------------------------------------------------------|-----------------------------|---------------------------------|-----------------------------------------------------|--------------------------|------------------------------------------|
| Parameter                           | level      | Primary Model                                                                                                               | A: Primary model covariates | B: CCW Heart-related conditions | C: CCW Heart-related conditions, excluding Charlson | D: CCW Heart failure     | E: CCW Heart failure, excluding Charlson |
| <b>Age Groups</b>                   | 65 to 69~  |                                                                                                                             |                             |                                 |                                                     |                          |                                          |
|                                     | 70 to 74   | 0.98 (0.88, 1.09)                                                                                                           | 1.02 (0.87, 1.21)           | 1.02 (0.86, 1.21)               | 1.02 (0.86, 1.21)                                   | 1.03 (0.87, 1.22)        | 1.03 (0.87, 1.22)                        |
|                                     | 75 to 84   | <b>0.74 (0.65, 0.83)</b>                                                                                                    | <b>0.70 (0.57, 0.85)</b>    | <b>0.68 (0.56, 0.83)</b>        | <b>0.68 (0.56, 0.83)</b>                            | <b>0.69 (0.57, 0.84)</b> | <b>0.69 (0.57, 0.84)</b>                 |
|                                     | 85 plus    | <b>0.25 (0.17, 0.37)</b>                                                                                                    | <b>0.20 (0.11, 0.34)</b>    | <b>0.19 (0.11, 0.33)</b>        | <b>0.19 (0.11, 0.33)</b>                            | <b>0.20 (0.11, 0.34)</b> | <b>0.20 (0.11, 0.34)</b>                 |
| <b>Race</b>                         | Black      | <b>0.75 (0.60, 0.93)</b>                                                                                                    | <b>0.67 (0.49, 0.90)</b>    | <b>0.67 (0.50, 0.91)</b>        | <b>0.67 (0.49, 0.90)</b>                            | <b>0.66 (0.49, 0.89)</b> | <b>0.66 (0.49, 0.89)</b>                 |
|                                     | Other      | 1.01 (0.86, 1.20)                                                                                                           | 0.93 (0.71, 1.20)           | 0.93 (0.72, 1.22)               | 0.93 (0.71, 1.21)                                   | 0.92 (0.70, 1.21)        | 0.92 (0.70, 1.20)                        |
|                                     | White~     |                                                                                                                             |                             |                                 |                                                     |                          |                                          |
| <b>Marital Status</b>               | Married~   |                                                                                                                             |                             |                                 |                                                     |                          |                                          |
|                                     | Unmarried  | 0.93 (0.84, 1.03)                                                                                                           | 0.98 (0.83, 1.14)           | 0.99 (0.84, 1.15)               | 0.99 (0.84, 1.15)                                   | 1.01 (0.86, 1.18)        | 1.01 (0.87, 1.19)                        |
| <b>SEER Region</b>                  | North      | 0.90 (0.77, 1.06)                                                                                                           | 0.98 (0.77, 1.24)           | 0.98 (0.77, 1.24)               | 0.98 (0.77, 1.24)                                   | 0.99 (0.78, 1.25)        | 0.98 (0.78, 1.24)                        |
|                                     | Central    |                                                                                                                             |                             |                                 |                                                     |                          |                                          |
|                                     | Northeast  | 1.03 (0.91, 1.17)                                                                                                           | 1.16 (0.96, 1.41)           | 1.18 (0.97, 1.42)               | 1.17 (0.97, 1.42)                                   | 1.12 (0.93, 1.36)        | 1.12 (0.93, 1.36)                        |
|                                     | South      | 0.98 (0.87, 1.11)                                                                                                           | 0.95 (0.77, 1.16)           | 0.95 (0.77, 1.16)               | 0.95 (0.77, 1.16)                                   | 0.94 (0.77, 1.15)        | 0.94 (0.77, 1.15)                        |
|                                     | West~      |                                                                                                                             |                             |                                 |                                                     |                          |                                          |
| <b>% below poverty</b>              | < 5.0%~    |                                                                                                                             |                             |                                 |                                                     |                          |                                          |
|                                     | 5.0 - 9.9% | <b>0.85 (0.75, 0.97)</b>                                                                                                    | 0.81 (0.66, 1.00)           | 0.82 (0.66, 1.01)               | 0.82 (0.66, 1.01)                                   | 0.81 (0.66, 0.99)        | 0.81 (0.66, 1.00)                        |
|                                     | 10.0-19.9% | <b>0.87 (0.77, 0.99)</b>                                                                                                    | <b>0.78 (0.63, 0.96)</b>    | <b>0.78 (0.63, 0.96)</b>        | <b>0.78 (0.63, 0.96)</b>                            | <b>0.78 (0.63, 0.96)</b> | <b>0.78 (0.63, 0.95)</b>                 |
|                                     | >= 20.0%   | 0.88 (0.76, 1.02)                                                                                                           | 0.83 (0.65, 1.06)           | 0.83 (0.65, 1.06)               | 0.83 (0.65, 1.06)                                   | 0.80 (0.63, 1.02)        | 0.81 (0.63, 1.02)                        |
| <b>Charlson score for 1yr prior</b> | 0~         |                                                                                                                             |                             |                                 |                                                     |                          |                                          |

|                            |            | Conditions 12 months prior to 3 months post diagnosis<br>(excluding those with 1st Herceptin up to 90 days after diagnosis) |                             |                                 |                                                     |                          |                                          |
|----------------------------|------------|-----------------------------------------------------------------------------------------------------------------------------|-----------------------------|---------------------------------|-----------------------------------------------------|--------------------------|------------------------------------------|
| Parameter                  | level      | Primary Model                                                                                                               | A: Primary model covariates | B: CCW Heart-related conditions | C: CCW Heart-related conditions, excluding Charlson | D: CCW Heart failure     | E: CCW Heart failure, excluding Charlson |
|                            | 1          | 0.90 (0.80, 1.02)                                                                                                           | 0.90 (0.75, 1.09)           | 0.94 (0.77, 1.16)               |                                                     | 0.92 (0.77, 1.11)        |                                          |
|                            | 2+         | <b>0.84 (0.73, 0.97)</b>                                                                                                    | 0.90 (0.72, 1.12)           | 0.96 (0.75, 1.24)               |                                                     | 1.06 (0.85, 1.32)        |                                          |
| <b>Diagnosis Year</b>      | 2010~      |                                                                                                                             |                             |                                 |                                                     |                          |                                          |
|                            | 2011       | <b>1.12 (1.02, 1.23)</b>                                                                                                    | 1.06 (0.91, 1.23)           | 1.06 (0.92, 1.23)               | 1.06 (0.92, 1.23)                                   | 1.08 (0.93, 1.25)        | 1.08 (0.94, 1.25)                        |
| <b>ER/PR Status</b>        | HR+~       |                                                                                                                             |                             |                                 |                                                     |                          |                                          |
|                            | HR-        | 1.04 (0.94, 1.15)                                                                                                           | 1.09 (0.93, 1.27)           | 1.10 (0.94, 1.29)               | 1.11 (0.94, 1.30)                                   | 1.11 (0.95, 1.30)        | 1.11 (0.95, 1.30)                        |
| <b>AJCC Tumor Size</b>     | T1a~       |                                                                                                                             |                             |                                 |                                                     |                          |                                          |
|                            | T1b        | <b>1.72 (1.18, 2.51)</b>                                                                                                    | 1.64 (0.97, 2.78)           | 1.66 (0.98, 2.81)               | 1.67 (0.99, 2.83)                                   | 1.67 (0.98, 2.83)        | 1.68 (0.99, 2.85)                        |
|                            | T1c        | <b>2.19 (1.54, 3.12)</b>                                                                                                    | <b>2.08 (1.28, 3.38)</b>    | <b>2.11 (1.30, 3.44)</b>        | <b>2.13 (1.31, 3.45)</b>                            | <b>2.09 (1.28, 3.42)</b> | <b>2.10 (1.28, 3.43)</b>                 |
|                            | T2         | <b>2.30 (1.61, 3.28)</b>                                                                                                    | <b>2.20 (1.35, 3.58)</b>    | <b>2.23 (1.37, 3.64)</b>        | <b>2.26 (1.39, 3.67)</b>                            | <b>2.20 (1.34, 3.60)</b> | <b>2.22 (1.36, 3.63)</b>                 |
|                            | T3         | <b>2.04 (1.36, 3.05)</b>                                                                                                    | <b>1.94 (1.09, 3.43)</b>    | <b>1.99 (1.12, 3.54)</b>        | <b>2.00 (1.13, 3.55)</b>                            | <b>2.00 (1.12, 3.56)</b> | <b>1.97 (1.11, 3.51)</b>                 |
|                            | T4         | <b>2.58 (1.75, 3.81)</b>                                                                                                    | <b>2.15 (1.21, 3.83)</b>    | <b>2.16 (1.22, 3.83)</b>        | <b>2.18 (1.23, 3.86)</b>                            | <b>2.36 (1.34, 4.17)</b> | <b>2.35 (1.33, 4.17)</b>                 |
| <b>AJCC Nodes Involved</b> | N0~        |                                                                                                                             |                             |                                 |                                                     |                          |                                          |
|                            | N1         | <b>1.26 (1.14, 1.41)</b>                                                                                                    | <b>1.53 (1.29, 1.82)</b>    | <b>1.54 (1.29, 1.82)</b>        | <b>1.54 (1.30, 1.83)</b>                            | <b>1.59 (1.34, 1.89)</b> | <b>1.58 (1.33, 1.88)</b>                 |
|                            | N2/N3      | <b>1.36 (1.19, 1.55)</b>                                                                                                    | <b>1.75 (1.40, 2.19)</b>    | <b>1.74 (1.39, 2.17)</b>        | <b>1.74 (1.39, 2.17)</b>                            | <b>1.71 (1.37, 2.13)</b> | <b>1.72 (1.37, 2.15)</b>                 |
| <b>Tumor Grade</b>         | Well~      |                                                                                                                             |                             |                                 |                                                     |                          |                                          |
|                            | Moderately | <b>1.68 (1.19, 2.38)</b>                                                                                                    | 1.61 (1.00, 2.57)           | <b>1.63 (1.02, 2.61)</b>        | <b>1.64 (1.03, 2.61)</b>                            | <b>1.62 (1.02, 2.58)</b> | <b>1.63 (1.02, 2.59)</b>                 |
|                            | Poorly     | <b>2.29 (1.63, 3.23)</b>                                                                                                    | <b>2.41 (1.52, 3.82)</b>    | <b>2.43 (1.54, 3.85)</b>        | <b>2.44 (1.54, 3.85)</b>                            | <b>2.48 (1.57, 3.91)</b> | <b>2.48 (1.58, 3.91)</b>                 |
|                            | Unknown    | 1.48 (0.90, 2.44)                                                                                                           | 1.18 (0.56, 2.51)           | 1.23 (0.58, 2.64)               | 1.25 (0.58, 2.66)                                   | 1.21 (0.57, 2.56)        | 1.21 (0.57, 2.55)                        |
| <b>Surgery Type</b>        | Mast only~ |                                                                                                                             |                             |                                 |                                                     |                          |                                          |



|                                               |            | Conditions 12 months prior to 3 months post diagnosis<br>(excluding those with 1st Herceptin up to 90 days after diagnosis) |                             |                                 |                                                     |                          |                                          |
|-----------------------------------------------|------------|-----------------------------------------------------------------------------------------------------------------------------|-----------------------------|---------------------------------|-----------------------------------------------------|--------------------------|------------------------------------------|
| Parameter                                     | level      | Primary Model                                                                                                               | A: Primary model covariates | B: CCW Heart-related conditions | C: CCW Heart-related conditions, excluding Charlson | D: CCW Heart failure     | E: CCW Heart failure, excluding Charlson |
|                                               | BCS only   | <b>1.15 (1.04, 1.28)</b>                                                                                                    | <b>1.31 (1.11, 1.55)</b>    | <b>1.30 (1.10, 1.53)</b>        | <b>1.31 (1.11, 1.54)</b>                            | <b>1.28 (1.09, 1.51)</b> | <b>1.29 (1.10, 1.52)</b>                 |
|                                               | BCS & Rad  | <b>0.73 (0.63, 0.86)</b>                                                                                                    | <b>0.56 (0.43, 0.73)</b>    | <b>0.57 (0.44, 0.74)</b>        | <b>0.57 (0.44, 0.74)</b>                            | <b>0.57 (0.44, 0.74)</b> | <b>0.57 (0.44, 0.74)</b>                 |
|                                               | Mast & Rad | 1.02 (0.83, 1.25)                                                                                                           | 0.86 (0.58, 1.28)           | 0.87 (0.58, 1.29)               | 0.87 (0.58, 1.29)                                   | 0.85 (0.57, 1.27)        | 0.86 (0.57, 1.29)                        |
| <b>Heart-related chronic conditions (CCW)</b> | 0~         |                                                                                                                             |                             |                                 |                                                     |                          |                                          |
|                                               | 1          |                                                                                                                             |                             | 1.04 (0.82, 1.32)               | 1.04 (0.82, 1.32)                                   |                          |                                          |
|                                               | 2          |                                                                                                                             |                             | 1.17 (0.93, 1.47)               | 1.16 (0.93, 1.46)                                   |                          |                                          |
|                                               | 3+         |                                                                                                                             |                             | 0.94 (0.72, 1.23)               | 0.92 (0.72, 1.16)                                   |                          |                                          |
| <b>Heart failure (CCW)</b>                    | Absent~    |                                                                                                                             |                             |                                 |                                                     |                          |                                          |
|                                               | Present    |                                                                                                                             |                             |                                 |                                                     | <b>0.41 (0.26, 0.64)</b> | <b>0.42 (0.27, 0.66)</b>                 |

**Table legend:** Alternative models above display the results of sensitivity analyses testing two cardiac-specific measures of co-morbidity, one using all heart-related conditions listed in the Medicare Chronic Conditions Warehouse (*CCW Heart-related conditions*), the second using only heart failure diagnoses (*CCW Heart Failure*). Sensitivity analyses were limited to the subset of patients untreated with herceptin until at least 3 months after diagnosis, in order to capture pre-treatment prevalent heart conditions (n=1042). The primary model was re-run on this subset (Model A) with results generally similar to the full cohort primary model. Models B and C include a control variable for CCW Heart related conditions with and without a separate variable for the overall Charlson co-morbidity score, while Models D and E include a control variable for CCW-defined heart failure with and without a separate variable for the Charlson score. Significant findings are indicated in bold text. The overall CCW heart-related conditions count was not a significant predictor of trastuzumab receipt; the CCW heart failure variable was significantly associated with lower likelihood of receiving trastuzumab. There did not appear to be significant attenuation of the effect of race or age on the likelihood of trastuzumab receipt regardless of which combination of co-morbidity variables was included in the model.
